# Supplementary material
Source: Elsevier journal article supplement (https://www.sciencedirect.com/science/article/pii/S2531137918300543)
Supplement: mmc1 [file S2531137918300543:mmc1.docx]

**ANEXO**

**ESCALA CHOHES**

1. **DADOS DE IDENTIFICAﾇﾃO DO PACIENTE**

**Nome:_________________________________________________________________**

**HC: _________________________ Diagntico: _____________________________**

**Data de Nascimento:_______________ Idade:___________ Sexo:_______________**

**Telefone:_________________ Celular:________________ Recado:______________**

**Data da avalia鈬o:** _____________________

Pontua鈬o parcial para cada lado do quadril

Lado quadril: D/E

**2. Nome do avaliador: ___________________________________________________**

**Visita**:

( ) Avalia鈬o inicial

( ) Segunda avalia鈬o

( ) Terceira avalia鈬o

**3. Grau do N咩el de Dor do Quadril: Durante as quatro 伃timas semanas, como voc・descreveria a sua dor no quadril?**

| Quadril Direito | Quadril Esquerdo | (*assinale uma alternativa para cada quadril*) | |
| --- | --- | --- | --- |
| (0) | (0) | INCAPACITANTE | Limita鈬o em todas as atividades (*i.e. dependente de cadeira de rodas*) |
| (10) | (10) | SEVERA | Limita鈬o importante para a maioria das atividades (*i.e. usa dispositivo de aux匀io##para andar diariamente*) |
| (20) | (20) | MODERADA | Alguma limita鈬o para executar algumas atividades (*i.e. usa dispositivo de aux匀io ocasionalmente*) |
| (30) | (30) | LEVE | Limita鈬o m匤ima ou n縊 significativa (*i.e. n縊 usa dispositivo de aux匀io*) |
| (40) | (40) | AUSENTE | Sem dor e nenhuma limita鈬o em qualquer atividade |

**4. FUNﾇﾃO** (*Assinalar o n咩el de fun鈬o mais elevado para cada se鈬o*)

**A. SE VESTIR:**

Nas 伃timas semanas, voc・teve qualquer dor, desconforto ou dificuldade em colocar ou tirar as meias ou os sapatos? (*Assinalar uma*)

| (0) | Na maior parte do tempo |
| --- | --- |
| (2) | Ocasionalmente |
| (4) | Nunca |

**B. ANDAR:**

1. Que tipo de dispositivo de aux匀io voc・tem usado nas 伃timas semanas? (*Assinalar todas que se aplicam*)

| (8) | Nenhum (Pule para a quest縊 4-B3* abaixo) |
| --- | --- |
| ( ) | Bengala |
| ( ) | Muletas |
| ( ) | Andador |
| ( ) | Cadeira de Rodas |

2. Usando o dispositivo de aux匀io, qu縊 distante voc・pode andar confortavelmente sem parar? (*Assinalar uma*)

| (8) | Ilimitada |
| --- | --- |
| (7) | Distante mas com limite (m痊imo 6 quarteirs ou duas vezes o comprimento total da galeria comercial) |
| (5) | Dist穗cia curta (m痊imo 2-3 quarteirs) |
| (3) | Apenas no 穃bito dom駸tico (30-60 metros) |
| (0 ) | Apenas transfer麩cia, necessita cadeira de rodas |

*3. **Sem** usar o dispositivo de aux匀io, qu縊 longe voc・pode andar confortavelmente sem parar? (*Assinalar uma*)

| (11) | Ilimitada |
| --- | --- |
| (7) | Distante mas com limite (m痊imo 6 quarteirs ou duas vezes o comprimento total da galeria comercial) |
| (5) | Dist穗cia curta (m痊imo 2-3 quarteirs) |
| (3) | Apenas no 穃bito dom駸tico (30-60 metros) |
| (0) | Apenas transfer麩cia, necessita cadeira de Rodas |

**C. SENTAR** (*Assinalar uma*)

| (5) | Senta confortavelmente em QUALQUER posi鈬o (*i.e.* fa軋 o paciente demonstrar a posi鈬o sentada em anel####) |
| --- | --- |
| (3) | Senta confortavelmente ・mesa ou no cinema mas n縊 tolera outras posi鋏es |
| (0 ) | N縊 consegue sentar confortavelmente por mais de alguns minutos sem mudar de posi鈬o |

**D. SUBIR ESCADAS:** Como consegue subir um lance de escadas confortavelmente? (*Assinalar o n咩el mais elevado de fun鈬o*)

| (4) | P・sobre p・sem corrim縊 |
| --- | --- |
| (2) | P・sobre p・com corrim縊 |
| (1) | Subir escada p・junto a p・ com ou sem corrim縊 |
| (0 ) | Incapaz de subir escadas ou sobe apenas com grande dificuldade |

**5. AMPLITUDE DE MOVIMENTO ARTICULAR**

| AMPLITUDE DE MOVIMENTO PASSIVO | QUADRIL DIREITO | QUADRIL ESQUERDO | 0 | 1 | 2 | 3 |
| --- | --- | --- | --- | --- | --- | --- |
| A.ROTAﾇﾃO INTERNA QUADRIL (sentado, joelho 90o) | ( )o | ( )o | <16 | 16-29 | 30-39 | >39 |
| B.ROTAﾇﾃO EXTERNA QUADRIL (sentado, joelho 90o) | ( )o | ( )o | <16 | 16-29 | 30-39 | >39 |
| C. FLEXﾃO DE QUADRIL (supino) | ( )o | ( )o | <90 | 90-100 | 101-114 | >114 |
| D.ABDUﾇﾃO DE QUADRIL (supino) | ( )o | ( )o | <20 | 20-29 | 30-39 | >39 |
| E. TESTE DE THOMAS:  Contratura em flex縊 de quadril presente | 1. Sim 2. N縊 | Contratura D  ( )o | (0) Sim  (1) N縊 | | Contratura E  ( )o | |

**6. TESTE MANUAL DOS MﾚSCULOS** (atrav駸 da ADM dispon咩el):

Pontuar da seguinte forma:

1=Tra輟 ou Nenhum Movimento 4= Antigravidade com Resist麩cia

2=Menor que Antigravidade 5= Tolera Resist麩cia Normal

3=Antigravidade

|  | DIREITO (1-5) | 0 | 1 |  | 2 | ESQUERDO (1-5) |
| --- | --- | --- | --- | --- | --- | --- |
| A.FLEXﾃO DE QUADRIL | ( ) | 1-2 | 3 |  | 4-5 | ( ) |
| B.EXTENSﾃO DE QUADRIL | ( ) | 1-2 | 3 |  | 4-5 | ( ) |
| C.ABDUﾇﾃO DE QUADRIL | ( ) | 1-2 | 3 |  | 4-5 | ( ) |
| D.ADUﾇﾃO DE QUADRIL | ( ) | 1-2 | 3 |  | 4-5 | ( ) |

| **7. A. MELHOR DESEMPENHO NA ALTURA DOS DEGRAUS** | QUADRIL DIREITO | QUADRIL ESQUERDO |
| --- | --- | --- |
| PERFORMANCE | (0) Incapaz | (0) Incapaz |
|  | (2) 15-20 cm (passo) | (2) 15-20 cm (passo) |
|  | (6) > 50 (transporte-degrau) | (6) > 50 (transporte-degrau) |

| **8. A. VELOCIDADE DE DESLOCAMENTO** | | SEM DISPOSITIVO DE AUXﾍLIO: 25m dist穗cia | | (...) segundos |
| --- | --- | --- | --- | --- |
|  | | DISPOSITIVO DE AUXﾍLIO: 25m dist穗cia | | (...) segundos *(N/A se 4-B=nenhum)* |
| B. MANQUEIRA (*Assinalar apenas uma*): | |  | |  |
| (1) | N縊 manca; n縊 usa dispositivo de aux匀io | |  |  |
| (0) | N縊 manca; usa dispositivo de aux匀io | |  |  |
| (0) | Manca; n縊 usa dispositivo de aux匀io | |  |  |
| (0) | Manca; usa dispositivo de aux匀io | |  |  |
